CORRECTION

# Correction: Ionotropic Chemosensory Receptors Mediate the Taste and Smell of Polyamines

The *PLOS Biology* Staff

## Notice of Republication

This article was republished on May 19<sup>th</sup>, 2016 to correct poor figure quality in the PDF version, which was introduced during the typesetting process. The publisher apologizes for these issues with the figure quality. Please download this article again to view the updated version.

## Reference

1. Hussain A, Zhang M, Üçpınar HK, Svensson T, Quillery E, Gompel N, et al. (2016) Ionotropic Chemosensory Receptors Mediate the Taste and Smell of Polyamines. *PLoS Biol* 14(5): e1002454. doi:[10.1371/journal.pbio.1002454](https://doi.org/10.1371/journal.pbio.1002454) PMID: [27145030](https://pubmed.ncbi.nlm.nih.gov/27145030/)

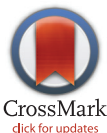

## OPEN ACCESS

**Citation:** The *PLOS Biology* Staff (2016) Correction: Ionotropic Chemosensory Receptors Mediate the Taste and Smell of Polyamines. *PLoS Biol* 14(6): e1002505. doi:[10.1371/journal.pbio.1002505](https://doi.org/10.1371/journal.pbio.1002505)

**Published:** June 21, 2016

**Copyright:** © 2016 The PLOS Biology Staff. This is an open access article distributed under the terms of the [Creative Commons Attribution License](https://creativecommons.org/licenses/by/4.0/), which permits unrestricted use, distribution, and reproduction in any medium, provided the original author and source are credited.
